# Supplementary material for: The impact of information about different absolute benefits and harms on intention to participate in colorectal cancer screening: A think-aloud study and online randomised experiment
Source: PubMed Central journal article supplement (PMC7886213; doi:10.1371/journal.pone.0246991), 2021-02-16
Supplement: pone.0246991.s003.pdf [file pone.0246991.s003.pdf]

**S1 Table. Estimates of absolute benefits and risks of screening presented within the scenarios**

| 15-year risk of developing CRC              | Biennial FIT |     |     | Sigmoidoscopy |     |     | Colonoscopy |      |      |
|---------------------------------------------|--------------|-----|-----|---------------|-----|-----|-------------|------|------|
|                                             | 1%           | 3%  | 5%  | 1%            | 3%  | 5%  | 1%          | 3%   | 5%   |
| CRC without screening                       | 10           | 30  | 50  | 10            | 30  | 50  | 10          | 30   | 50   |
| CRC with screening                          | 9            | 29  | 48  | 7             | 22  | 36  | 7           | 20   | 33   |
| Reduction in CRC with screening             | 1            | 1   | 2   | 3             | 8   | 14  | 3           | 10   | 17   |
| Deaths from CRC without screening           | 3            | 9   | 16  | 3             | 9   | 16  | 3           | 9    | 16   |
| Deaths from CRC after screening             | 2            | 5   | 8   | 1             | 5   | 8   | 1           | 4    | 6    |
| Reduction in deaths from CRC with screening | 1            | 4   | 8   | 2             | 4   | 8   | 2           | 5    | 10   |
| Number needing colonoscopy                  | 160          | 246 | 328 | 82            | 237 | 382 | 1000        | 1000 | 1000 |
| Additional colonoscopies                    | 39           | 121 | 209 | 36            | 103 | 195 | 42          | 124  | 226  |
| Complications*                              | 1            | 3   | 5   | 1             | 3   | 6   | 1           | 5    | 8    |

\* Requiring a visit to the emergency department or hospitalisation
