# Supplementary material for: The impact of information about different absolute benefits and harms on intention to participate in colorectal cancer screening: A think-aloud study and online randomised experiment
Source: PubMed Central journal article supplement (PMC7886213; doi:10.1371/journal.pone.0246991), 2021-02-16
Supplement: pone.0246991.s004.pdf [file pone.0246991.s004.pdf]

**S2 Table. Characteristics of participants for online survey**

|                                                       | n   | FIT              |                  |                  | Sigmoidoscopy    |                  |                  | Colonoscopy      |                  |                  | Incomplete responses |
|-------------------------------------------------------|-----|------------------|------------------|------------------|------------------|------------------|------------------|------------------|------------------|------------------|----------------------|
|                                                       |     | 1—5—3<br>n = 111 | 3—1—5<br>n = 109 | 5—3—1<br>n = 107 | 1—5—3<br>n = 109 | 3—1—5<br>n = 108 | 5—3—1<br>n = 108 | 1—5—3<br>n = 108 | 3—1—5<br>n = 109 | 5—3—1<br>n = 109 | n = 22               |
| Age                                                   | 978 |                  |                  |                  |                  |                  |                  |                  |                  |                  |                      |
| 45-49                                                 |     | 32 (29)          | 32 (29)          | 31 (29)          | 29 (27)          | 31 (29)          | 42 (39)          | 31 (29)          | 36 (33)          | 24 (22)          | 7 (32)               |
| 50-54                                                 |     | 30 (27)          | 33 (30)          | 33 (31)          | 36 (33)          | 34 (31)          | 25 (23)          | 32 (30)          | 27 (25)          | 34 (31)          | 6 (27)               |
| 55-59                                                 |     | 23 (21)          | 22 (20)          | 17 (16)          | 20 (18)          | 21 (19)          | 17 (16)          | 18 (17)          | 24 (22)          | 24 (22)          | 5 (23)               |
| 60-64                                                 |     | 17 (15)          | 12 (11)          | 18 (17)          | 13 (12)          | 11 (10)          | 14 (13)          | 18 (17)          | 11 (10)          | 14 (13)          | 1 (5)                |
| 65-69                                                 |     | 7 (6)            | 6 (6)            | 5 (5)            | 5 (5)            | 5 (5)            | 8 (7)            | 6 (6)            | 6 (6)            | 9 (8)            | 2 (9)                |
| >70                                                   |     | 2 (2)            | 4 (4)            | 3 (3)            | 6 (6)            | 6 (6)            | 2 (2)            | 3 (3)            | 5 (4)            | 4 (4)            | 1 (5)                |
| Sex                                                   | 978 |                  |                  |                  |                  |                  |                  |                  |                  |                  |                      |
| Female (n, %)                                         |     | 71 (64)          | 77 (71)          | 71 (66)          | 73 (67)          | 72 (67)          | 63 (58)          | 65 (60)          | 77 (71)          | 75 (69)          | 17 (77)              |
| Ethnicity                                             | 972 |                  |                  |                  |                  |                  |                  |                  |                  |                  |                      |
| White (n, %)                                          |     | 101 (91)         | 107 (98)         | 100 (94)         | 108 (99)         | 104 (97)         | 101 (94)         | 104 (97)         | 105 (97)         | 105 (97)         | 21 (95)              |
| Education                                             | 978 |                  |                  |                  |                  |                  |                  |                  |                  |                  |                      |
| University level (n, %)                               |     | 62 (56)          | 50 (46)          | 48 (45)          | 60 (55)          | 53 (49)          | 50 (46)          | 46 (43)          | 53 (49)          | 49 (45)          | 9 (41)               |
| Family history of bowel cancer                        | 958 | 12 (11)          | 13 (12)          | 10 (10)          | 11 (10)          | 13 (13)          | 5 (5)            | 6 (6)            | 8 (7)            | 8 (8)            | 3 (14)               |
| Numeracy                                              | 975 |                  |                  |                  |                  |                  |                  |                  |                  |                  |                      |
| High numeracy (n, %)                                  |     | 85 (77)          | 81 (74)          | 93 (87)          | 87 (80)          | 88 (81)          | 81 (75)          | 84 (79)          | 86 (80)          | 83 (77)          | 16 (73)              |
| Aware of current screening programme                  | 978 | 82 (74)          | 74 (68)          | 77 (72)          | 84 (77)          | 80 (74)          | 81 (75)          | 78 (72)          | 79 (72)          | 74 (68)          | 17 (77)              |
| History of IBD                                        | 968 | 1 (1)            | 3 (3)            | 3 (3)            | 3 (3)            | 4 (4)            | 7 (7)            | 3 (3)            | 3 (3)            | 4 (4)            | 0 (0)                |
| Prior invitation to screening                         | 978 | 34 (31)          | 32 (29)          | 33 (31)          | 33 (30)          | 32 (30)          | 34 (31)          | 31 (29)          | 34 (31)          | 33 (30)          | 8 (36)               |
| Prior attendance at screening                         | 978 | 24 (22)          | 19 (17)          | 27 (25)          | 25 (23)          | 24 (22)          | 25 (23)          | 23 (21)          | 26 (24)          | 24 (22)          | 7 (32)               |
| FIT or FOBT                                           |     | 20 (18)          | 14 (13)          | 23 (21)          | 22 (20)          | 18 (17)          | 19 (18)          | 19 (18)          | 21 (19)          | 16 (15)          | 5 (23)               |
| Sigmoidoscopy                                         |     | 2 (2)            | 2 (2)            | 1 (1)            | 0 (0)            | 2 (2)            | 0 (0)            | 0 (0)            | 1 (1)            | 0 (0)            | 0 (0)                |
| Colonoscopy                                           |     | 2 (2)            | 3 (3)            | 3 (3)            | 3 (3)            | 4 (4)            | 6 (6)            | 4 (4)            | 4 (4)            | 8 (7)            | 2 (9)                |
| Cancer worry (mean, SD)*                              | 966 | 5.6 (2.2)        | 5.3 (2.2)        | 5.8 (2.3)        | 5.6 (2.2)        | 5.4 (2.1)        | 5.3 (1.9)        | 5.0 (2.0)        | 5.1 (1.9)        | 5.4 (2.2)        | 5.6 (2.2)            |
| Perception of risk of bowel cancer (mean, SD)**       | 978 | 3.8 (2.3)        | 3.4 (2.2)        | 3.8 (2.2)        | 3.5 (2.2)        | 3.7 (2.2)        | 3.5 (2.5)        | 3.5 (2.2)        | 3.2 (2.3)        | 3.5 (2.3)        | 3.8 (2.4)            |
| Inconvenience, worry or burden of tests (mean, SD)*** |     |                  |                  |                  |                  |                  |                  |                  |                  |                  |                      |
| FIT                                                   | 978 | 1.4 (0.7)        | 1.5 (0.7)        | 1.5 (0.6)        | 1.5 (0.7)        | 1.5 (0.8)        | 1.4 (0.6)        | 1.3 (0.5)        | 1.5 (0.8)        | 1.6 (0.9)        | 1.6 (0.7)            |
| Sigmoidoscopy                                         | 978 | 2.5 (1.0)        | 2.7 (0.9)        | 2.7 (0.8)        | 2.7 (0.8)        | 2.8 (0.9)        | 2.6 (0.9)        | 2.3 (0.7)        | 2.6 (0.9)        | 2.8 (0.9)        | 2.5 (0.7)            |
| Colonoscopy                                           | 978 | 3.1 (1.1)        | 3.3 (1.0)        | 3.3 (0.9)        | 3.3 (0.9)        | 3.6 (1.1)        | 3.1 (1.1)        | 3.0 (0.9)        | 3.1 (1.1)        | 3.4 (1.0)        | 3.1 (0.9)            |

\* On a scale of 3-15 \*\* On a continuous scale from Unlikely (0) to Likely (10) \*\*\* On a scale from 1 (No inconvenience, worry or burden) to 5 (Very great inconvenience, worry or burden).
