# Supplementary material for: The impact of information about different absolute benefits and harms on intention to participate in colorectal cancer screening: A think-aloud study and online randomised experiment
Source: PubMed Central journal article supplement (PMC7886213; doi:10.1371/journal.pone.0246991), 2021-02-16
Supplement: pone.0246991.s005.pdf [file pone.0246991.s005.pdf]

**S3 Table. Intention to attend screening within each study group across all three scenarios**

| Group                    | FIT     |         |         | Sigmoidoscopy |         |         | Colonoscopy |         |         |
|--------------------------|---------|---------|---------|---------------|---------|---------|-------------|---------|---------|
|                          | 1—5—3   | 3—1—5   | 5—3—1   | 1—5—3         | 3—1—5   | 5—3—1   | 1—5—3       | 3—1—5   | 5—3—1   |
| Order                    | n=111   | n=109   | n=107   | n=109         | n=108   | n=108   | n=108       | n=109   | n=109   |
| Scenario 1<br>(n, % yes) | 86 (77) | 75 (69) | 83 (78) | 86 (79)       | 69 (64) | 81 (75) | 75 (69)     | 75 (69) | 81 (74) |
| Scenario 2<br>(n, % yes) | 99 (89) | 63 (58) | 66 (62) | 90 (83)       | 59 (55) | 74 (69) | 83 (77)     | 54 (50) | 74 (68) |
| Scenario 3<br>(n, % yes) | 91 (82) | 78 (72) | 56 (52) | 85 (78)       | 77 (71) | 58 (54) | 80 (74)     | 83 (76) | 53 (49) |
