# Supplementary material for: The impact of information about different absolute benefits and harms on intention to participate in colorectal cancer screening: A think-aloud study and online randomised experiment
Source: PLoS One. 2021 Feb 16;16(2):e0246991. doi: 10.1371/journal.pone.0246991 (PMC7886213; doi:10.1371/journal.pone.0246991)
Supplement: S6 Table — (PDF) [file pone.0246991.s008.pdf]

**S6 Table. Adjusted percentages  $\pm$  95% CI\* for response patterns to the scenarios.**

| Variable                       | Always no (%)    | Scenario dependent (%) | Always yes (%)   | <i>p</i> value    |
|--------------------------------|------------------|------------------------|------------------|-------------------|
| Screening test                 |                  |                        |                  | 0.085             |
| FIT                            | 15.7 (12.0-19.4) | 29.2 (24.4-34.0)       | 55.1 (50.1-60.1) |                   |
| Sigmoidoscopy                  | 20.5 (16.4-24.5) | 21.9 (17.4-26.4)       | 57.7 (52.7-62.7) |                   |
| Colonoscopy                    | 19.2 (15.2-23.2) | 29.6 (24.6-34.5)       | 51.2 (46.1-56.3) |                   |
| Age (years)                    |                  |                        |                  | <b>0.002</b>      |
| 45-54                          | 15.2 (12.5-17.8) | 26.9 (23.2-30.6)       | 58.0 (54.1-61.9) |                   |
| 55-64                          | 22.1 (17.6-26.7) | 26.9 (21.8-32.0)       | 51.0 (45.6-56.3) |                   |
| >65                            | 35.3 (23.7-47.0) | 23.1 (13.0-33.2)       | 41.6 (30.9-52.2) |                   |
| Sex                            |                  |                        |                  | 0.063             |
| Female                         | 19.7 (16.9-22.6) | 28.1 (24.7-31.5)       | 52.2 (48.6-55.8) |                   |
| Male                           | 15.9 (12.2-19.7) | 24.6 (20.1-29.2)       | 59.4 (54.5-64.4) |                   |
| Ethnicity                      |                  |                        |                  | <b>0.046</b>      |
| White                          | 18.6 (16.3-20.9) | 26.2 (23.4-29.0)       | 55.2 (52.2-58.1) |                   |
| Non-white                      | 15.0 (4.7-25.3)  | 45.3 (29.3-61.3)       | 39.8 (24.5-55.0) |                   |
| University level education     |                  |                        |                  | 0.92              |
| Yes                            | 18.6 (15.3-21.9) | 27.3 (23.5-31.2)       | 54.1 (50.0-58.1) |                   |
| No                             | 18.3 (15.1-21.6) | 26.4 (22.3-30.4)       | 55.3(51.0-59.6)  |                   |
| Family history                 |                  |                        |                  | <b>0.013</b>      |
| No                             | 18.4 (16.1-20.7) | 28.2 (25.3-31.1)       | 53.4 (50.3-56.4) |                   |
| Yes                            | 19.9 (11.3-28.5) | 13.5 (6.1-20.8)        | 66.7 (57.2-76.1) |                   |
| Prior history of screening     |                  |                        |                  | <b>0.0002</b>     |
| No                             | 21.1 (18.2-24.0) | 28.0 (24.7-31.3)       | 50.9 (47.4-54.5) |                   |
| Yes                            | 9.3 (5.0-13.6)   | 23.0 (16.3-29.7)       | 67.7 (60.5-74.9) |                   |
| Numeracy                       |                  |                        |                  | 0.051             |
| Low                            | 19.5 (14.5)      | 20.0 (14.4-25.6)       | 60.5 (54.1-66.9) |                   |
| High                           | 18.1 (15.5-20.7) | 28.8 (25.6-31.9)       | 53.1 (49.8-56.4) |                   |
| Understanding of information   |                  |                        |                  | 0.58              |
| Incorrect                      | 18.8 (15.5-22.1) | 25.4 (21.5-29.3)       | 55.8 (51.7-60.0) |                   |
| Correct                        | 18.1 (14.9-21.3) | 28.3 (24.4-32.3)       | 53.5 (49.4-57.6) |                   |
| Prior perceptions of screening |                  |                        |                  | <b>&lt;0.0001</b> |
| Yes for all                    | 8.1 (5.8-10.4)   | 27.1 (23.6-30.7)       | 64.8 (61.0-68.6) |                   |
| No for all                     | 18.4 (1.5-35.3)  | 21.2 (3.4-38.9)        | 60.4 (40.0-81.2) |                   |
| It depends                     | 34.7 (29.7-39.7) | 27.7 (23.1-32.4)       | 37.6 (32.5-42.6) |                   |

\* These “adjusted” percentages are predicted from multivariable multinomial logistic regression models including all factors in the table in addition to the order in which the scenarios were presented. They are presented here alongside the p-values which are included in the main text in Table 2. They were estimated using the margins command in Stata and are the percentage of responders expected for each outcome, stratified by each category / group, should they have the same levels of all the other covariates in the model as all included survey responders (these percentages are also known as recycled predictions).
